# Supplementary material for: Clinical efficacy of CDK4/6 inhibitor plus endocrine therapy in HR-positive/HER2-0 and HER2-low-positive metastatic breast cancer: a secondary analysis of PALOMA-2 and PALOMA-3 trials
Source: PubMed Central journal article supplement — eBioMedicine. 2024 Jun 10;105:105186. doi: 10.1016/j.ebiom.2024.105186 (PMC11215206; doi:10.1016/j.ebiom.2024.105186), 2024-06-10

## Supplementary Appendix

### Table of Contents

|                                                                                                                                              |           |
|----------------------------------------------------------------------------------------------------------------------------------------------|-----------|
| <i>Table S1. Summary of eligibility criteria and treatment arms of the PALOMA-2 and -3 clinical trials .....</i>                             | <b>2</b>  |
| <i>Table S2. Censoring reasons for the PALOMA-2 and -3 clinical trials .....</i>                                                             | <b>3</b>  |
| <i>Table S3. Median progression-free survival assessed by investigator and median overall survival .....</i>                                 | <b>4</b>  |
| <i>Table S4. Progression-free survival (investigator assessment) rate by landmark time in PALOMA-2 trial .....</i>                           | <b>5</b>  |
| <i>Table S5. Progression-free survival (Investigator assessed) and overall survival analyses by treatment groups or by HER2 status .....</i> | <b>6</b>  |
| <i>Table S6. Best overall response in the HER2-0 or HER2-low-positive population using relative risk .....</i>                               | <b>7</b>  |
| <i>Table S7. Progression-free survival (investigator assessment) analysis by multivariable Cox proportional hazards model .....</i>          | <b>8</b>  |
| <i>Table S8. Testing proportional hazards assumption for Cox regression .....</i>                                                            | <b>9</b>  |
| <i>Table S9. Progression-free survival (investigator assessment) rate by landmark time in PALOMA-3 trial .....</i>                           | <b>10</b> |
| <i>Table S10. Overall survival (investigator assessment) rate by landmark time in PALOMA-3 trial .....</i>                                   | <b>11</b> |
| <i>Figure S1. CONSORT flow diagram .....</i>                                                                                                 | <b>12</b> |
| <i>Figure S2. Four Kaplan-Meier curves of progression-free survival assessed by investigator in PALOMA-2 study .....</i>                     | <b>13</b> |
| <i>Figure S3. Kaplan-Meier curves of progression-free survival assessed by blinded independent central review ...</i>                        | <b>14</b> |
| <i>Figure S4. Four Kaplan-Meier curves of progression-free survival assessed by investigator in PALOMA-3 study .....</i>                     | <b>15</b> |

**Table S1. Summary of eligibility criteria and treatment arms of the PALOMA-2 and -3 clinical trials**

| Study                     | Patients Cohort                                                                                                                                                                                                                                                                                                                                                                                                                                                                                                                                                                                                                                                                                                                                                                                                                                                 | Treatment Arm                |                                                                                                                                                                                                          |
|---------------------------|-----------------------------------------------------------------------------------------------------------------------------------------------------------------------------------------------------------------------------------------------------------------------------------------------------------------------------------------------------------------------------------------------------------------------------------------------------------------------------------------------------------------------------------------------------------------------------------------------------------------------------------------------------------------------------------------------------------------------------------------------------------------------------------------------------------------------------------------------------------------|------------------------------|----------------------------------------------------------------------------------------------------------------------------------------------------------------------------------------------------------|
| PALOMA-2<br>(NCT01740427) | <b>Inclusion</b> <ul style="list-style-type: none"> <li>• Postmenopausal women with ER-positive, HER2-negative advanced breast cancer.</li> <li>• No prior systemic therapy for advanced disease.</li> <li>• Adequate organ function,</li> <li>• An ECOG performance status of 0 to 2.</li> <li>• Measurable disease according to RECIST, version 1.1 or lesions only in the bone.</li> </ul> <b>Exclusion</b> <ul style="list-style-type: none"> <li>• Patients with advanced, symptomatic, visceral spread who were at risk for short-term, life-threatening complications.</li> <li>• Prior adjuvant or neoadjuvant treatment with a nonsteroidal aromatase inhibitor with disease recurrence or within 12 months of completing therapy.</li> <li>• Known active uncontrolled or symptomatic CNS metastases.</li> <li>• Prior to a CDK inhibitor.</li> </ul> | Palbociclib plus letrozole   | Oral letrozole 2.5 mg once daily plus oral palbociclib 125 mg, given once daily for 3 weeks followed by 1 week off in 28-day cycles                                                                      |
|                           |                                                                                                                                                                                                                                                                                                                                                                                                                                                                                                                                                                                                                                                                                                                                                                                                                                                                 | Placebo plus letrozole       | Oral letrozole 2.5 mg once daily plus oral placebo, given once daily for 3 weeks followed by 1 week off in 28-day cycles                                                                                 |
| PALOMA-3<br>(NCT01942135) | <b>Inclusion</b> <ul style="list-style-type: none"> <li>• Women aged 18 years or older of any menopausal status.</li> <li>• An ECOG performance status of 0–1.</li> <li>• Measurable disease according to RECIST, version 1.1 or 1 bone-only disease.</li> <li>• One previous line of chemotherapy in advanced disease was allowed.</li> <li>• Disease relapse or progression had to occur after previous endocrine therapy.</li> </ul> <b>Exclusion</b> <ul style="list-style-type: none"> <li>• Patients had extensive symptomatic visceral metastasis and were at risk of life-threatening complications in the short term.</li> <li>• Uncontrolled CNS metastases.</li> <li>• Prior to a CDK inhibitor, fulvestrant, everolimus, or a PI3K/mTOR pathway inhibitor.</li> </ul>                                                                               | Fulvestrant plus palbociclib | Fulvestrant, 500 mg intramuscularly per standard of care every 14 days for the first three injections and then every 28 days and palbociclib, 125 mg per day orally for 3 weeks, followed by 1 week off. |
|                           |                                                                                                                                                                                                                                                                                                                                                                                                                                                                                                                                                                                                                                                                                                                                                                                                                                                                 | Fulvestrant plus placebo     | Fulvestrant, 500 mg intramuscularly per standard of care every 14 days for the first three injections and then every 28 days and placebo per day orally for 3 weeks, followed by 1 week off.             |

Abbreviations: ER, oestrogen receptor; HER2, human epidermal growth factor receptor 2; RECIST, Response Evaluation Criteria in Solid Tumors; CCND1, cyclin D1; ECOG, Eastern Cooperative Oncology Group; CDK, cyclin-dependent kinases; CNS, central nervous system.

**Table S2. Censoring reasons for the PALOMA-2 and -3 clinical trials**

| Study        | Outcome                          | Reason                                                                                                  | HER2-0                                      |            |                          |                      | HER2-low-positive |                          |                      |
|--------------|----------------------------------|---------------------------------------------------------------------------------------------------------|---------------------------------------------|------------|--------------------------|----------------------|-------------------|--------------------------|----------------------|
|              |                                  |                                                                                                         | All                                         | All        | Palbociclib <sup>a</sup> | Placebo <sup>a</sup> | All               | Palbociclib <sup>a</sup> | Placebo <sup>a</sup> |
|              |                                  |                                                                                                         | no. of patients (proportion of censoring %) |            |                          |                      |                   |                          |                      |
| PALO<br>MA-2 | Investigator<br>-assessed<br>PFS | <i>Any reason</i>                                                                                       | 335 (50.3)                                  | 86 (56.2)  | 61 (58.7)                | 25 (51.0)            | 249 (48.5)        | 189 (55.6)               | 60 (34.7)            |
|              |                                  | (1) Discontinued treatment without disease progression or death                                         | 54                                          | 12         | 9                        | 3                    | 42                | 28                       | 14                   |
|              |                                  | (2) Given new anti-cancer treatment prior to disease progression and last dose of study treatment       | 1                                           | 0          | 0                        | 0                    | 1                 | 0                        | 1                    |
|              |                                  | (3) In follow-up for progression                                                                        | 257                                         | 66         | 48                       | 18                   | 191               | 151                      | 40                   |
|              |                                  | (4) No on-study disease assessments                                                                     | 19                                          | 7          | 3                        | 4                    | 12                | 9                        | 3                    |
|              |                                  | (5) Unacceptable gap (>30 weeks) between PD or Death to the most recent prior adequate assessment       | 4                                           | 1          | 1                        | 0                    | 3                 | 1                        | 2                    |
|              |                                  | <i>Any reason</i>                                                                                       | 418 (62.8)                                  | 97 (63.4)  | 65 (62.5)                | 32 (65.3)            | 321 (62.6)        | 227 (66.8)               | 94 (54.3)            |
|              |                                  | (1) Discontinued treatment without disease progression or death                                         | 149                                         | 32         | 21                       | 11                   | 117               | 69                       | 48                   |
|              |                                  | (2) Given new anti-cancer treatment prior to disease progression and last dose of study treatment       | 1                                           | 0          | 0                        | 0                    | 1                 | 0                        | 1                    |
|              |                                  | (3) In follow-up for progression                                                                        | 245                                         | 57         | 40                       | 17                   | 188               | 148                      | 40                   |
| PALO<br>MA-3 | Investigator<br>-assessed<br>PFS | (4) No on-study disease assessments                                                                     | 2                                           | 0          | 0                        | 0                    | 2                 | 2                        | 0                    |
|              |                                  | (5) No scans/data available                                                                             | 17                                          | 8          | 4                        | 4                    | 9                 | 6                        | 3                    |
|              |                                  | (6) Unacceptable gap (>30 weeks) between PD or Death to the most recent prior adequate assessment       | 4                                           | 0          | 0                        | 0                    | 4                 | 2                        | 2                    |
|              |                                  | <i>Any reason</i>                                                                                       | 325 (62.5)                                  | 105 (68.6) | 80 (74.8)                | 25 (54.3)            | 220 (59.9)        | 164 (68.6)               | 56 (43.8)            |
|              |                                  | (1) Discontinued study without disease progression or death                                             | 2                                           | 0          | 0                        | 0                    | 2                 | 2                        | 0                    |
|              |                                  | (2) Given new anti-cancer treatment prior to disease progression and after last dose of study treatment | 12                                          | 3          | 2                        | 1                    | 9                 | 6                        | 3                    |
| PALO<br>MA-3 | BICR-PFS                         | (3) In follow-up for progression                                                                        | 297                                         | 100        | 76                       | 24                   | 197               | 151                      | 46                   |
|              |                                  | (4) No adequate baseline assessments                                                                    | 1                                           | 0          | 0                        | 0                    | 1                 | 1                        | 0                    |
|              |                                  | (5) No on-study disease assessments                                                                     | 13                                          | 2          | 2                        | 0                    | 11                | 4                        | 7                    |
|              |                                  | <i>Any reason</i>                                                                                       | 153 (72.5)                                  | 48 (72.7)  | 33 (80.5)                | 15 (60.0)            | 105 (72.4)        | 88 (83.0)                | 17 (43.6)            |
|              |                                  | (1) Given new anti-cancer treatment prior to disease progression and after last dose of study treatment | 17                                          | 5          | 4                        | 1                    | 12                | 9                        | 3                    |
|              |                                  | (2) In follow-up for progression                                                                        | 129                                         | 42         | 29                       | 13                   | 87                | 74                       | 13                   |
|              |                                  | (3) LF <sup>b</sup>                                                                                     | 5                                           | 1          | 0                        | 1                    | 4                 | 4                        | 0                    |
| PALO<br>MA-3 | OS                               | (4) No on-study disease assessments                                                                     | 2                                           | 0          | 0                        | 0                    | 2                 | 1                        | 1                    |
|              |                                  | <i>Any reason</i>                                                                                       | 210 (40.4)                                  | 59 (38.6)  | 44 (41.1)                | 15 (32.6)            | 151 (41.1)        | 101 (42.3)               | 50 (39.1)            |
|              |                                  | (1) Subject no longer being followed for survival                                                       | 62                                          | 19         | 13                       | 6                    | 43                | 22                       | 21                   |
|              |                                  | (2) Subject remains in follow-up                                                                        | 148                                         | 40         | 31                       | 9                    | 108               | 79                       | 29                   |

Abbreviations: PFS, progression-free survival; OS, overall survival; BICR, blinded independent central review.

<sup>a</sup> The treatment group was Palbociclib or Placebo combined with Letrozole (or Fulvestrant)

<sup>b</sup> LF indicated the censoring reason was redacted in order to reduce the risk of patient re-identification.

**Table S3. Median progression-free survival assessed by investigator and median overall survival**

| Study    | HER2 status       | Treatment received        | no. of PFS events (no. of patients) | mPFS (95% CI)-months <sup>a</sup> | no. of OS events (no. of patients) | mOS (95% CI)-months <sup>a</sup> |
|----------|-------------------|---------------------------|-------------------------------------|-----------------------------------|------------------------------------|----------------------------------|
| PALOMA-2 | HER2-0            | Palbociclib + Letrozole   | 43 (104)                            | NR [16.4, NR]                     | NA                                 | NA                               |
|          |                   | Placebo + Letrozole       | 24 (49)                             | 22.2 [11.0, 24.7]                 | NA                                 | NA                               |
|          | HER2-low-positive | Palbociclib + Letrozole   | 151 (340)                           | 24.8 [22.0, 27.6]                 | NA                                 | NA                               |
|          |                   | Placebo + Letrozole       | 113 (173)                           | 13.8 [11.1, 16.8]                 | NA                                 | NA                               |
| PALOMA-3 | HER2-0            | Palbociclib + Fulvestrant | 27 (107)                            | NR [7.3, NR]                      | 63 (107)                           | 36.5 [27.2, 43.7]                |
|          |                   | Placebo + Fulvestrant     | 21 (46)                             | 5.4 [3.6, NR]                     | 31 (46)                            | 34.6 [22.2, 39.5]                |
|          | HER2-low-positive | Palbociclib + Fulvestrant | 75 (239)                            | 8.0 [7.4, 11.0]                   | 138 (239)                          | 34.8 [27.7, 40.4]                |
|          |                   | Placebo + Fulvestrant     | 72 (128)                            | 3.5 [2.1, 5.5]                    | 78 (128)                           | 27.4 [22.2, 33.0]                |

Abbreviations: NR, not reached; NA, not applicable; CI, confidence interval.

<sup>a</sup> The 95% CI was obtained based on the complementary log-log scale method.

**Table S4. Progression-free survival (investigator assessment) rate by landmark time in PALOMA-2 trial**

| Landmark time (Months) | HER2-0, PFS rate (95% CI)       |                            | HER2-low-positive, PFS rate (95% CI) |                             |
|------------------------|---------------------------------|----------------------------|--------------------------------------|-----------------------------|
|                        | Palbociclib + Letrozole (N=104) | Placebo + Letrozole (N=49) | Palbociclib + Letrozole (N=340)      | Placebo + Letrozole (N=173) |
| 3                      | 92% [87%, 97%]                  | 89% [80%, 99%]             | 92% [89%, 95%]                       | 81% [75%, 87%]              |
| 6                      | 86% [79%, 93%]                  | 82% [71%, 94%]             | 86% [83%, 90%]                       | 70% [63%, 77%]              |
| 9                      | 82% [74%, 90%]                  | 72% [60%, 87%]             | 80% [76%, 84%]                       | 63% [56%, 71%]              |
| 12                     | 69% [60%, 79%]                  | 65% [53%, 81%]             | 74% [69%, 79%]                       | 56% [49%, 64%]              |
| 15                     | 62% [53%, 73%]                  | 58% [45%, 75%]             | 67% [62%, 72%]                       | 48% [41%, 56%]              |
| 18                     | 56% [47%, 67%]                  | 54% [40%, 71%]             | 62% [57%, 68%]                       | 41% [34%, 49%]              |
| 21                     | 55% [46%, 66%]                  | 54% [40%, 71%]             | 57% [52%, 63%]                       | 35% [28%, 44%]              |
| 24                     | 53% [43%, 65%]                  | 35% [20%, 62%]             | 51% [45%, 58%]                       | 27% [20%, 36%]              |
| 27                     | 53% [43%, 65%]                  | 28% [14%, 58%]             | 43% [36%, 52%]                       | 25% [18%, 35%]              |
| 30                     | 53% [43%, 65%]                  | 28% [14%, 58%]             | 41% [33%, 51%]                       | 25% [18%, 35%]              |
| 33                     | NA                              | 28% [14%, 58%]             | 31% [17%, 56%]                       | 8% [2%, 43%]                |

Abbreviations: CI, confidence interval; NA, not applicable; PFS, progression-free survival.

**Table S5. Progression-free survival (Investigator assessed) and overall survival analyses by treatment groups or by HER2 status**

| Study    | Endpoint | Target                                              | Group                     | Hazard ratio (95% CI) <sup>a</sup> | P value <sup>a</sup> | Relative excess risk due to interaction <sup>b</sup> |
|----------|----------|-----------------------------------------------------|---------------------------|------------------------------------|----------------------|------------------------------------------------------|
| PALOMA-2 | PFS      | Palbociclib + Letrozole vs. Placebo + Letrozole     | All patients              | 0.57 [0.46, 0.71]                  | <0.0001              | -0.68, (95% CI, -1.43 to 0.08), <i>p</i> = 0.078     |
|          |          |                                                     | HER2-0                    | 0.79 [0.48, 1.30]                  | 0.34                 |                                                      |
|          |          |                                                     | HER2-low-positive         | 0.52 [0.41, 0.66]                  | <0.0001              |                                                      |
|          |          | HER2-low-positive vs. HER2-0                        | All patients              | 1.12 [0.86, 1.47]                  | 0.40                 |                                                      |
|          |          |                                                     | Palbociclib + Letrozole   | 0.95 [0.68, 1.34]                  | 0.79                 |                                                      |
|          |          |                                                     | Placebo + Letrozole       | 1.49 [0.96, 2.31]                  | 0.078                |                                                      |
| PALOMA-3 | PFS      | Palbociclib + Fulvestrant vs. Placebo + Letrozole   | All patients              | 0.42 [0.31, 0.55]                  | <0.0001              | 0.86, (95% CI, -0.23 to 1.95), <i>p</i> = 0.12       |
|          |          |                                                     | HER2-0                    | 0.54 [0.30, 0.95]                  | 0.034                |                                                      |
|          |          |                                                     | HER2-low-positive         | 0.39 [0.28, 0.54]                  | <0.0001              |                                                      |
|          |          | HER2-low-positive vs. HER2-0                        | All patients              | 1.27 [0.91, 1.76]                  | 0.16                 |                                                      |
|          |          |                                                     | Palbociclib + Fulvestrant | 1.09 [0.70, 1.70]                  | 0.69                 |                                                      |
|          |          |                                                     | Placebo + Fulvestrant     | 1.56 [0.96, 2.53]                  | 0.075                |                                                      |
|          | OS       | Palbociclib + Fulvestrant vs. Placebo + Fulvestrant | All patients              | 0.79 [0.63, 1.00]                  | 0.049                | -0.04, (95% CI, -0.66 to 0.58), <i>p</i> = 0.90      |
|          |          |                                                     | HER2-0                    | 0.79 [0.51, 1.22]                  | 0.29                 |                                                      |
|          |          |                                                     | HER2-low-positive         | 0.79 [0.60, 1.04]                  | 0.093                |                                                      |
|          |          | HER2-low-positive vs. HER2-0                        | All patients              | 0.97 [0.76, 1.24]                  | 0.81                 |                                                      |
|          |          |                                                     | Palbociclib + Fulvestrant | 0.95 [0.71, 1.28]                  | 0.74                 |                                                      |
|          |          |                                                     | Placebo + Fulvestrant     | 1.01 [0.66, 1.53]                  | 0.98                 |                                                      |

Abbreviations: CI, confidence interval; PFS, progression-free survival; OS, overall survival.

<sup>a</sup> All the hazard ratios and P value were obtained from unstratified Cox proportional hazards regression models.

<sup>b</sup> Relative excess risk due to interaction (RERI) with 95% CI (by delta method) as a measure of additive interaction, the p-value is obtained based on null hypothesis RERI=0, i.e., no additive interaction.

**Table S6. Best overall response in the HER2-0 or HER2-low-positive population using relative risk**

| Study    | Variable                                                    | Palbociclib + Letrozole<br>(or Fulvestrant) | Placebo + Letrozole<br>(or Fulvestrant) | Relative risk<br>(95% CI) | <i>P</i> value |
|----------|-------------------------------------------------------------|---------------------------------------------|-----------------------------------------|---------------------------|----------------|
| PALOMA-2 | All HER2-0 patients - no.                                   | 104                                         | 49                                      |                           |                |
|          | Rate of objective response - % (95% CI) <sup>a</sup>        | 36.5 (27.3,46.6)                            | 30.6 (18.3,45.4)                        | 1.19<br>(0.73,1.95)       | 0.47           |
|          | Rate of clinical benefit response - % (95% CI) <sup>b</sup> | 85.6 (77.3,91.7)                            | 73.5 (58.9,85.1)                        | 1.16<br>(0.97,1.40)       | 0.071          |
|          | All HER2-low-positive patients - no.                        | 340                                         | 173                                     |                           |                |
|          | Rate of objective response - % (95% CI) <sup>a</sup>        | 43.8 (38.5,49.3)                            | 35.8 (28.7,43.5)                        | 1.22<br>(0.97,1.54)       | 0.082          |
|          | Rate of clinical benefit response - % (95% CI) <sup>b</sup> | 84.7 (80.4,88.4)                            | 69.4 (61.9,76.1)                        | 1.22<br>(1.10,1.36)       | <0.0001        |
| PALOMA-3 | All HER2-0 patients - no.                                   | 107                                         | 46                                      |                           |                |
|          | Rate of objective response - % (95% CI) <sup>a,c</sup>      | 8.4 (3.9,15.4)                              | 8.7 (2.4,20.8)                          | 0.97<br>(0.31,2.98)       | 1.00           |
|          | Rate of clinical benefit response - % (95% CI) <sup>b</sup> | 24.3 (16.5,33.5)                            | 21.7 (10.9,36.4)                        | 1.12<br>(0.59,2.12)       | 0.73           |
|          | All HER2-low-positive patients - no.                        | 239                                         | 128                                     |                           |                |
|          | Rate of objective response - % (95% CI) <sup>a</sup>        | 11.3 (7.6,16.0)                             | 5.5 (2.2,10.9)                          | 2.07<br>(0.93,4.61)       | 0.066          |
|          | Rate of clinical benefit response - % (95% CI) <sup>b</sup> | 38.5 (32.3,45.0)                            | 18.0 (11.7,25.7)                        | 2.14<br>(1.43,3.21)       | <0.0001        |

Abbreviations: CI, confidence interval.

<sup>a</sup> Rate of objective response was defined as the percentage of patients who had a confirmed complete response or a partial response. And the exact 95% CI was obtained by the Clopper-Pearson method.

<sup>b</sup> Rate of clinical benefit response was defined as the percentage of patients who had a confirmed complete response, a partial response, or stable disease for 24 weeks or more. And the exact 95% CI was obtained by the Clopper-Pearson method.

<sup>c</sup> There were only four individuals, with HER2-0 and receiving Placebo + Fulvestrant, achieved objective response in PALOMA-3 study, so the corresponding *P* value was obtained by the Fisher's exact test. Other *P* values were obtained by the Pearson  $\chi^2$  test.

**Table S7. Progression-free survival (investigator assessment) analysis by multivariable Cox proportional hazards model**

| Study    | Model                              | HER2-0                             |         | HER2-low-positive                  |         |
|----------|------------------------------------|------------------------------------|---------|------------------------------------|---------|
|          |                                    | Hazard ratio (95% CI) <sup>a</sup> | P value | Hazard ratio (95% CI) <sup>a</sup> | P value |
| PALOMA-2 | Multivariable model 1 <sup>b</sup> | 0.69 (0.36, 1.31)                  | 0.25    | 0.53 (0.42, 0.68)                  | <0.0001 |
|          | Multivariable model 2 <sup>c</sup> | 0.76 (0.46, 1.26)                  | 0.29    | 0.53 (0.42, 0.68)                  | <0.0001 |
| PALOMA-3 | Multivariable model 1 <sup>b</sup> | 0.56 (0.31, 1.00)                  | 0.051   | 0.40 (0.29, 0.55)                  | <0.0001 |
|          | Multivariable model 2 <sup>c</sup> | 0.59 (0.33, 1.04)                  | 0.070   | 0.38 (0.28, 0.53)                  | <0.0001 |

Abbreviations: CI, confidence interval

<sup>a</sup> The hazard ratio is for Palbociclib+ Letrozole (or Palbociclib + Fulvestrant) versus Placebo + Letrozole (or Placebo + Fulvestrant).

<sup>b</sup> The Multivariable model 1 included the treatment arm and the most imbalance covariate based on Table 1 and Table 2. In PALOMA-2 trial, the most imbalance baseline covariate are ‘Most recent therapy’ and ‘ECOG score at baseline’ in HER2-0 and HER2-low-positive population, respectively; In PALOMA-3 trial, the most imbalance baseline covariate are ‘Previous lines of therapies for metastatic disease’ and ‘Histopathological classification’ in HER2-0 and HER2-low-positive population, respectively.

<sup>c</sup> The multivariable model 2 included the treatment arm and two covariates, i.e., age (<65 or ≥ 65 years old) and bone-only disease at baseline, per physician’s suggestion.



**Table S8. Testing proportional hazards assumption for Cox regression**

| Study             | Group                     | Endpoint                         | Variable                                           | P value |
|-------------------|---------------------------|----------------------------------|----------------------------------------------------|---------|
| PALOMA-2          | HER2-0                    | Investigator-assessed PFS        | Treatment Group                                    | 0.89    |
|                   |                           | BICR-assessed PFS                | Treatment Group                                    | 0.69    |
|                   |                           | Multivariable Model 1            | Treatment Group                                    | 0.45    |
|                   |                           |                                  | Most recent therapy                                | 0.078   |
|                   |                           | Multivariable Model 2            | Treatment Group                                    | 0.96    |
|                   |                           |                                  | Age (<65 or ≥ 65 years old)                        | 0.062   |
|                   | HER2-low-positive         | Investigator-assessed PFS        | Treatment Group                                    | 0.34    |
|                   |                           | BICR-assessed PFS                | Treatment Group                                    | 0.91    |
|                   |                           | Multivariable Model 1            | Treatment Group                                    | 0.41    |
|                   |                           |                                  | ECOG score at baseline                             | 0.75    |
| PALOMA-3          | HER2-0                    | Investigator-assessed PFS        | Treatment Group                                    | 0.16    |
|                   |                           | BICR-assessed PFS                | Treatment Group                                    | 0.12    |
|                   |                           | Multivariable Model 1            | Treatment Group                                    | 0.15    |
|                   |                           |                                  | Previous lines of therapies for metastatic disease | 0.97    |
|                   |                           | Multivariable Model 2            | Treatment Group                                    | 0.17    |
|                   |                           |                                  | Age (<65 or ≥ 65 years old)                        | 0.45    |
| HER2-low-positive | OS                        | Treatment Group                  | 0.10                                               |         |
|                   | Investigator-assessed PFS | Treatment Group                  | 0.20                                               |         |
|                   | BICR-assessed PFS         | Treatment Group                  | 0.80                                               |         |
|                   | Multivariable Model 1     | Treatment Group                  | 0.21                                               |         |
|                   |                           | Histopathological classification | 0.94                                               |         |
|                   | Multivariable Model 2     | Treatment Group                  | 0.28                                               |         |
|                   |                           | Age (<65 or ≥ 65 years old)      | 0.46                                               |         |
|                   | OS                        | Treatment Group                  | 0.63                                               |         |

Abbreviations: CI, confidence interval; PFS, progression-free survival; OS, overall survival; BICR, blinded independent central review.

**Table S9. Progression-free survival (investigator assessment) rate by landmark time in PALOMA-3 trial**

| Landmark time (Months) | HER2-0, PFS rate (95% CI)         |                              | HER2-low-positive, PFS rate (95% CI) |                               |
|------------------------|-----------------------------------|------------------------------|--------------------------------------|-------------------------------|
|                        | Palbociclib + Fulvestrant (N=107) | Placebo + Fulvestrant (N=46) | Palbociclib + Fulvestrant (N=239)    | Placebo + Fulvestrant (N=128) |
| 2                      | 85% [78%, 92%]                    | 85% [75%, 96%]               | 84% [79%, 89%]                       | 61% [52%, 70%]                |
| 4                      | 73% [63%, 84%]                    | 58% [44%, 77%]               | 75% [69%, 81%]                       | 43% [35%, 54%]                |
| 6                      | 67% [56%, 80%]                    | 42% [27%, 67%]               | 65% [58%, 73%]                       | 30% [21%, 43%]                |
| 8                      | 62% [48%, 79%]                    | 28% [11%, 71%]               | 49% [38%, 64%]                       | 30% [21%, 43%]                |
| 10                     | 62% [48%, 79%]                    | NA                           | 37% [23%, 60%]                       | 30% [21%, 43%]                |

Abbreviations: CI, confidence interval; NA, not applicable; PFS, progression-free survival.

**Table S10. Overall survival (investigator assessment) rate by landmark time in PALOMA-3 trial**

| Landmark time (Months) | HER2-0, OS rate (95% CI)          |                              | HER2-low-positive, OS rate (95% CI) |                               |
|------------------------|-----------------------------------|------------------------------|-------------------------------------|-------------------------------|
|                        | Palbociclib + Fulvestrant (N=107) | Placebo + Fulvestrant (N=46) | Palbociclib + Fulvestrant (N=239)   | Placebo + Fulvestrant (N=128) |
| 6                      | 93% [89%, 98%]                    | 100% [100%, 100%]            | 95% [92%, 97%]                      | 93% [88%, 97%]                |
| 12                     | 85% [78%, 92%]                    | 91% [83%, 100%]              | 86% [82%, 90%]                      | 83% [76%, 90%]                |
| 18                     | 78% [70%, 86%]                    | 84% [74%, 96%]               | 75% [70%, 81%]                      | 70% [62%, 78%]                |
| 24                     | 66% [57%, 76%]                    | 60% [46%, 76%]               | 65% [59%, 72%]                      | 56% [48%, 66%]                |
| 30                     | 55% [46%, 66%]                    | 52% [39%, 70%]               | 54% [48%, 61%]                      | 45% [37%, 56%]                |
| 36                     | 52% [43%, 63%]                    | 44% [31%, 63%]               | 49% [43%, 56%]                      | 40% [31%, 50%]                |
| 42                     | 43% [34%, 54%]                    | 26% [15%, 44%]               | 42% [36%, 50%]                      | 33% [25%, 43%]                |
| 48                     | 30% [21%, 44%]                    | 23% [13%, 41%]               | 35% [28%, 44%]                      | 30% [23%, 41%]                |

Abbreviations: CI, confidence interval; NA, not applicable; OS, overall survival.

**Figure S1. CONSORT flow diagram**

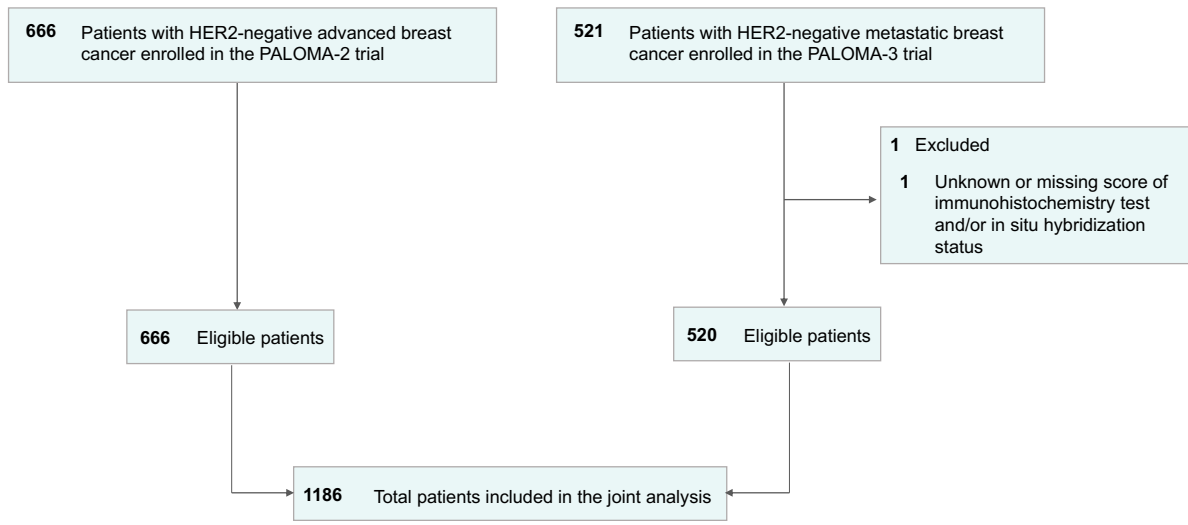

**Figure S2. Four Kaplan-Meier curves of progression-free survival assessed by investigator in PALOMA-2 study**

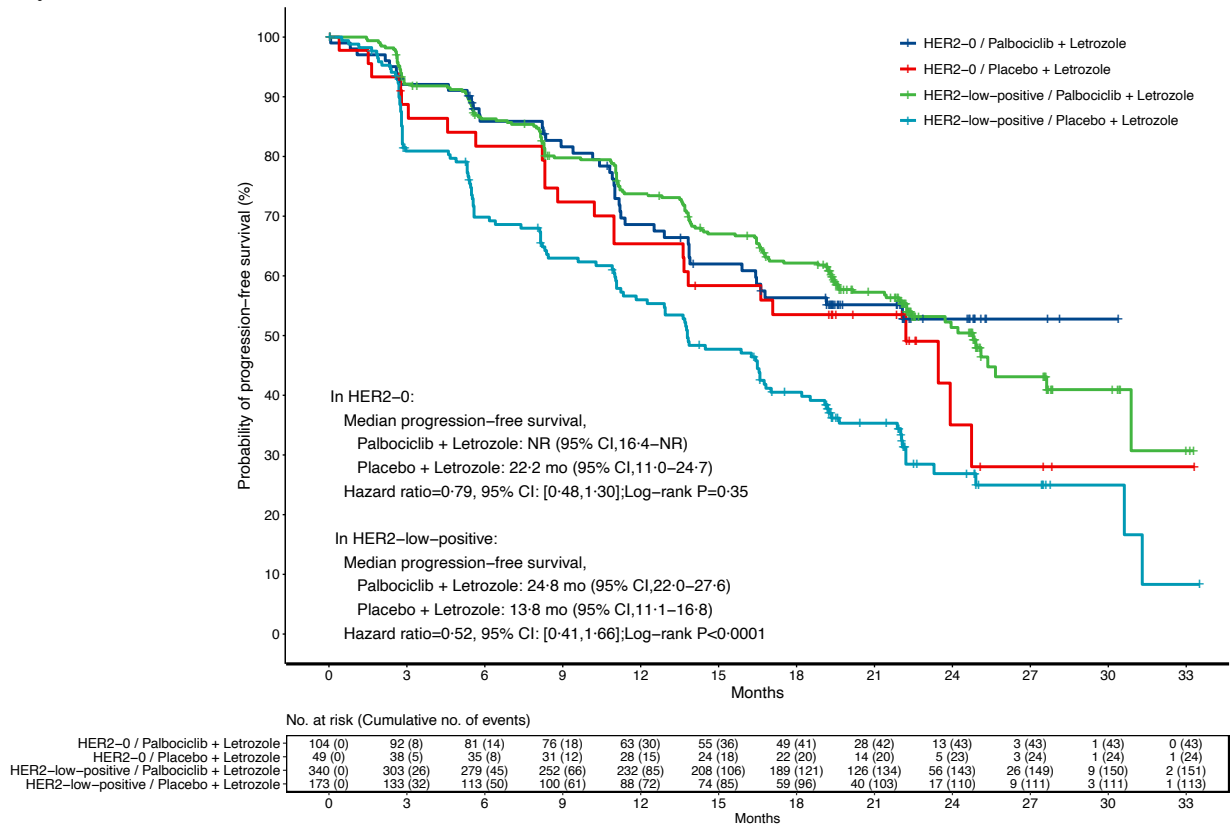

**Figure S3. Kaplan-Meier curves of progression-free survival assessed by blinded independent central review**

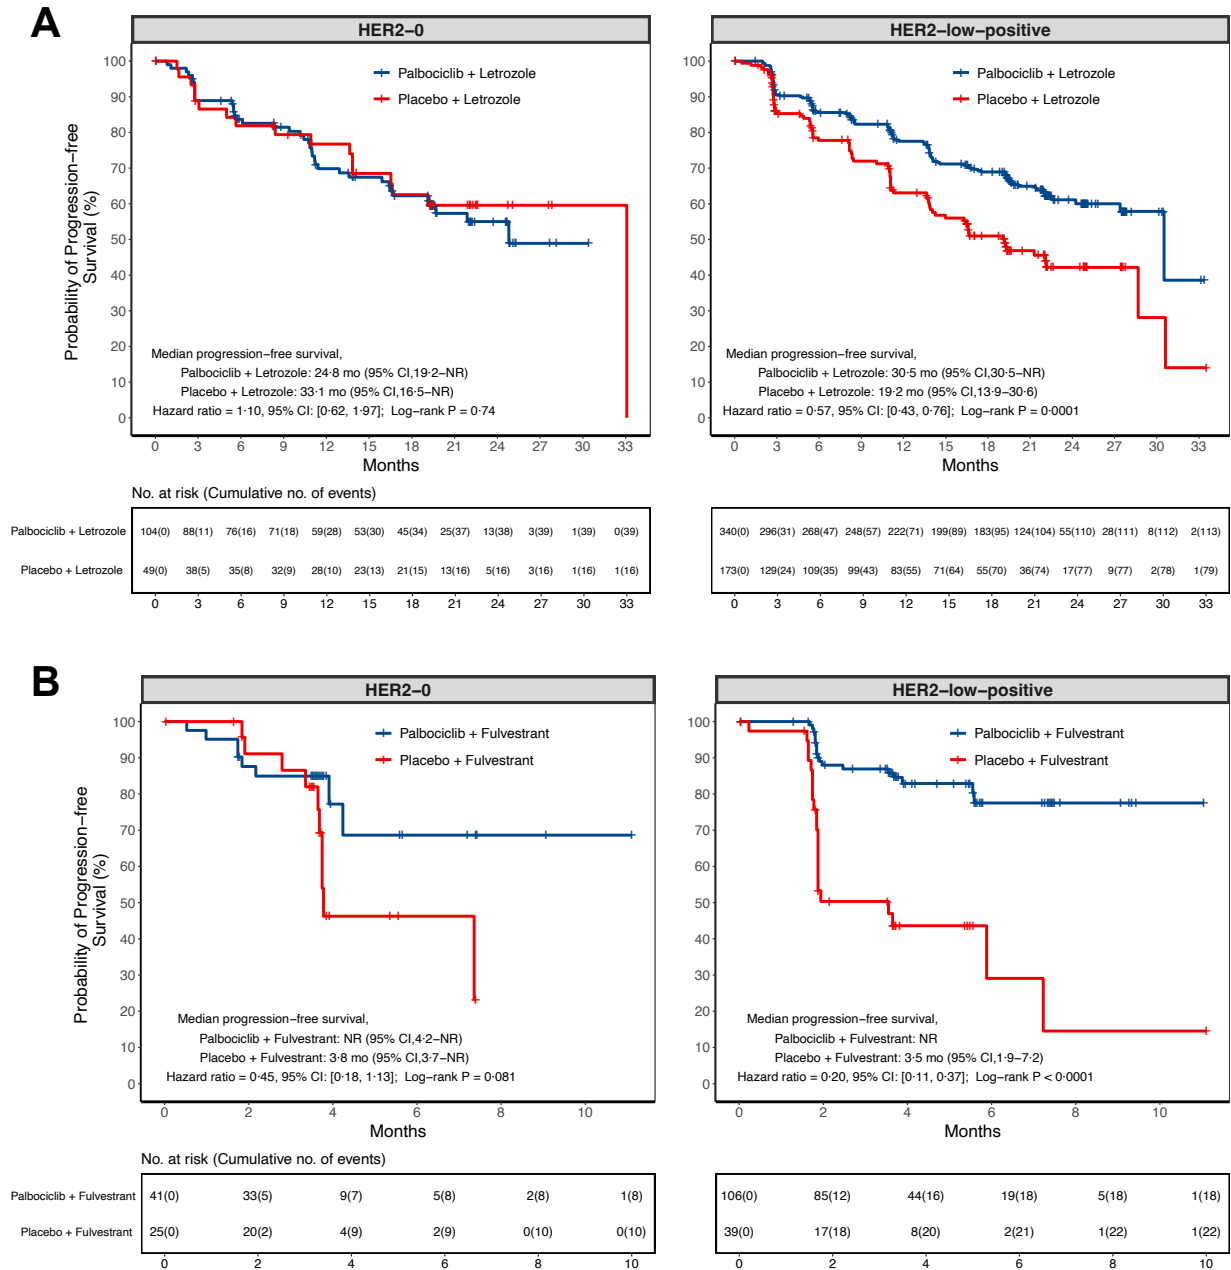

Panel A shows progression-free survival assessed by blinded independent central review in HER2-0 or HER2-low-positive population from PALOMA-2 trial, the relative excess risk due to interaction (RERI) = -0.85 (95% CI: -1.72 to 0.02,  $p = 0.055$  based on null hypothesis RERI=0) with HER2-low-positive and Palbociclib + Letrozole as the reference groups. Panel B shows progression-free survival assessed by blinded independent central review in HER2-0 or HER2-low-positive population from PALOMA-3 trial, the RERI = -2.77 (95% CI: -6.22 to 0.67,  $p = 0.11$  based on null hypothesis RERI=0) with HER2-low-positive and Palbociclib + Fulvestrant as the reference groups.

**Figure S4. Four Kaplan-Meier curves of progression-free survival assessed by investigator in PALOMA-3 study**

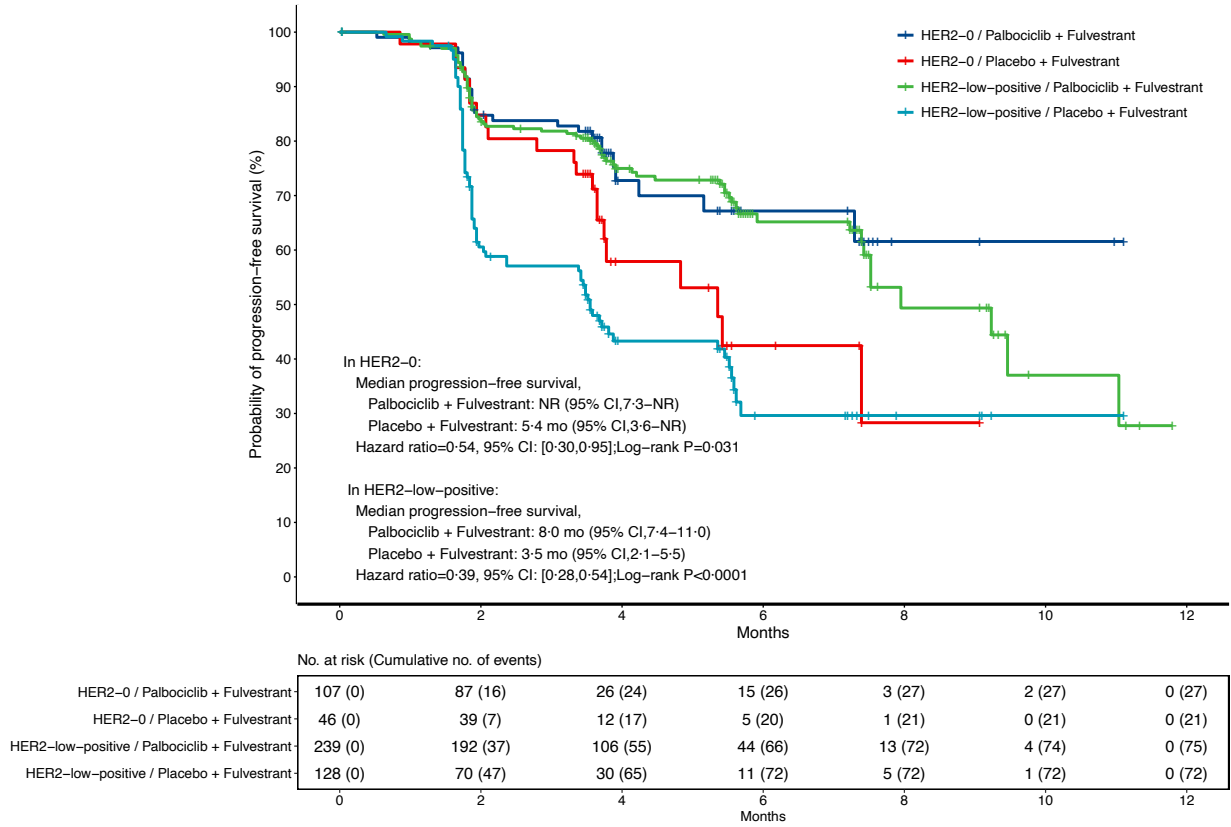

Supplement: mmc1.pdf [file mmc1.pdf]
